# Supplementary material
Source: publisher figshare collection journal article supplement (https://diabetesjournals.figshare.com/ndownloader/files/24992891)
Supplement: Supplementary file 1 [file 24992891]

## Sheet: Sheet1
Study	Signature	Study Name	Platform	Assay Type	Tissue	Organism	Strain (Control)	Strain (Perturbation)	Perturbation Details	# Control Samples	# Perturbation Samples	G2E Analysis URL	L1000CDS2 link (Top 500 Up and Down Genes)	BI-2536 in to 50
GDS3992	A	Diabetic OVE26 glomerulus	GPL1261	Microarray	glomerulus	Mus musculus	fvb/nj	OVE26 type 1 mouse	8 week old diabetic OVE26 mice	3 (GSM519766, GSM519445, GSM519444)	4 (GSM519813, GSM519814, GSM519815, GSM519816)	http://amp.pharm.mssm.edu/g2e/results/878dcc4600	https://amp.pharm.mssm.edu/L1000CDS2/#/result/5f170e0690b6ec00418b3cc4	0
GDS3990	A	Uninephrectomy effect on OVE26 diabetic kidney	GPL1261	Microarray	kidney	Mus musculus	FVB/NJ	OVE26 transgenic	OVE26 mice	2 (GSM536089, GSM536088)	2 (GSM536091, GSM536090)	http://amp.pharm.mssm.edu/g2e/results/95d269f098	https://amp.pharm.mssm.edu/L1000CDS2/#/result/5f170e0890b6ec00418b3cc6	0
GSE65561	A	Expression data from MSC-treated monocytes	GPL16686	Microarray	peripheral blood monocyte	Homo sapiens	non-diabetic patients	type 2 diabetic patients	Diabetes type 2	4 (GSM1600118, GSM1600120, GSM1600122, GSM1600124)	5 (GSM1600126, GSM1600128, GSM1600130, GSM1600132, GSM1600134)	http://amp.pharm.mssm.edu/g2e/results/df40084d3a	https://amp.pharm.mssm.edu/L1000CDS2/#/result/5f170e0b90b6ec00418b3cc8	4
GSE21324	A	Gene expression profiles of the diabetic glomerular endothelial cell	GPL6246	Microarray	glomerular endothelial cells	Mus musculus	Tie2-GFP/ +/+	Tie2-GFP/ DB/DB	diabetic nephropathy mouse model (BKS.Cg-m +/+ Leprdb/J )	3 (GSM532931, GSM532932, GSM532933)	3 (GSM532934, GSM532935, GSM532936)	http://amp.pharm.mssm.edu/g2e/results/839ef2c2a4	https://amp.pharm.mssm.edu/L1000CDS2/#/result/5f170e0d90b6ec00418b3cca	2
GSE20636	A	Expression data from OVE26 diabetic mouse kidney	GPL1261	Microarray	whole kidney	Mus musculus	FVB/NJ	OVE26	2 months OVE26	6 (GSM518238, GSM518239, GSM518240, GSM518241, GSM518242, GSM518243)	6 (GSM518232, GSM518233, GSM518234, GSM518235, GSM518236, GSM518237)	http://amp.pharm.mssm.edu/g2e/results/fb661f221c	https://amp.pharm.mssm.edu/L1000CDS2/#/result/5f170e1090b6ec00418b3ccc	0
GSE20636	B	Expression data from OVE26 diabetic mouse kidney	GPL1261	Microarray	whole kidney	Mus musculus	FVB/NJ	OVE26	4 months OVE26	4 (GSM518251, GSM518252, GSM518253, GSM518254)	7 (GSM518244, GSM518245, GSM518246, GSM518247, GSM518248, GSM518249, GSM518250)	http://amp.pharm.mssm.edu/g2e/results/e44756a06a	https://amp.pharm.mssm.edu/L1000CDS2/#/result/5f170e1290b6ec00418b3cce	0
GSE20636	C	Expression data from OVE26 diabetic mouse kidney	GPL1261	Microarray	whole kidney	Mus musculus	FVB/NJ	OVE26	8 months OVE26	6 (GSM518261, GSM518262, GSM518263, GSM518264, GSM518265, GSM518266)	6 (GSM518255, GSM518256, GSM518257, GSM518258, GSM518259, GSM518260)	http://amp.pharm.mssm.edu/g2e/results/943e7be973	https://amp.pharm.mssm.edu/L1000CDS2/#/result/5f170e1490b6ec00418b3cd0	3
GSE36336	A	Expression data from kidneys of diabetic WT and T3-/- mice	GPL1261	Microarray	kidney	Mus musculus	Diabetic Wild Type	Diabetic Timp3-/-	Activation of A Disintegrin and A Metalloprotease Domain17 (ADAM17)	3 (GSM889240, GSM889241, GSM889242)	3 (GSM889243, GSM889244, GSM889245)	http://amp.pharm.mssm.edu/g2e/results/cfb0775b1b	https://amp.pharm.mssm.edu/L1000CDS2/#/result/5f170e1790b6ec00418b3cd2	0
GSE30529	A	Transcriptome Analysis of Human Diabetic Kidney Disease (DKD Tubuli vs. Control Tubuli)	GPL571	Microarray	kidney tubules	Homo sapiens	Control Human Kidney Tubuli	DKD Human Kidney Tubuli	diabetic tubuli	12 (GSM757024, GSM757025, GSM757026, GSM757027, GSM757028, GSM757029, GSM757030, GSM757031, GSM757032, GSM757033, GSM757034, GSM757035)	10 (GSM757014, GSM757015, GSM757016, GSM757017, GSM757018, GSM757019, GSM757020, GSM757021, GSM757022, GSM757023)	http://amp.pharm.mssm.edu/g2e/results/b2197371ad	https://amp.pharm.mssm.edu/L1000CDS2/#/result/5f170e1990b6ec00418b3cd4	5
GSE30528	A	Transcriptome Analysis of Human Diabetic Kidney Disease (DKD Glomeruli vs. Control Glomeruli)	GPL571	Microarray	kidney glomerulus	Homo sapiens	Control Human Kidney Glomeruli	DKD Human Kidney Glomeruli	DKD glomeruli	13 (GSM757001, GSM757002, GSM757003, GSM757004, GSM757005, GSM757006, GSM757007, GSM757008, GSM757009, GSM757010, GSM757011, GSM757012, GSM757013)	9 (GSM756992, GSM756993, GSM756994, GSM756995, GSM756996, GSM756997, GSM756998, GSM756999, GSM757000)	http://amp.pharm.mssm.edu/g2e/results/a4824c0335	https://amp.pharm.mssm.edu/L1000CDS2/#/result/5f170e1b90b6ec00418b3cd6	0
GSE51205	A	Alteration of renal gene expression affected by atypical chemokine receptor D6 knockout in diabetic OVE26 (OVE) mice	GPL6246	Microarray	whole kidney	Mus musculus	FVB non-diabetes	FVB diabetes	diabetes	3 (GSM1240474, GSM1240475, GSM1240476)	3 (GSM1240480, GSM1240481, GSM1240482)	http://amp.pharm.mssm.edu/g2e/results/68b080aa2c	https://amp.pharm.mssm.edu/L1000CDS2/#/result/5f170e1e90b6ec00418b3cd8	2
GSE51205	B	Alteration of renal gene expression affected by atypical chemokine receptor D6 knockout in diabetic OVE26 (OVE) mice	GPL6246	Microarray	whole kidney	Mus musculus	FVB non-diabetes + D6 KO	FVB diabetes + D6 KO	diabetes + D6 KO	3 (GSM1240477, GSM1240478, GSM1240479)	3 (GSM1240483, GSM1240484, GSM1240485)	http://amp.pharm.mssm.edu/g2e/results/baab5bc554	https://amp.pharm.mssm.edu/L1000CDS2/#/result/5f170e2090b6ec00418b3cda	4
GSE69438	A	Nephroseq dataset.1_Ju CKD_Over-expression in Diabetic Nephropathy vs. Healthy Living Donor	GPL11670	Microarray	Glomeruli	Homo sapiens	Control Human Kidney Glomeruli	DKD Human Kidney Glomeruli	Diabetic Nephropathy	N/A	N/A	http://amp.pharm.mssm.edu/g2e/results/d1f2259d8c	https://amp.pharm.mssm.edu/L1000CDS2/#/result/5f170e2290b6ec00418b3cdc	0
GSE69438	B	Nephroseq dataset.2_Ju CKD_Over-expression in Discovery Cohort: Diabetic Nephropathy vs. Healthy Living Donor	GPL11670	Microarray	Tubulointerstitium	Homo sapiens	Control Human Kidney Tubuli	DKD Human Kidney Tubuli	Diabetic Nephropathy	N/A	N/A	http://amp.pharm.mssm.edu/g2e/results/28f8b61fac	https://amp.pharm.mssm.edu/L1000CDS2/#/result/5f170e2590b6ec00418b3cde	0
GSE21785	A	Nephroseq dataset.3_Schmid_diabetes_Over-expression in Group: Diabetic Nephropathy vs. Control	GPL96	Microarray	Kidney	Homo sapiens	Control Human Kidney Tubuli	DKD Human Kidney Tubuli	Diabetic Nephropathy	N/A	N/A	http://amp.pharm.mssm.edu/g2e/results/181ded3613	https://amp.pharm.mssm.edu/L1000CDS2/#/result/5f170e2790b6ec00418b3ce0	0
